# Supplementary material for: Structural Quality of Services and Use of Family Planning Services in Primary Health Care Facilities in Ethiopia. How Do Public and Private Facilities Compare?
Source: PubMed Central journal article supplement (PMC7345433; doi:10.3390/ijerph17124201), 2020-06-12
Supplement: ijerph-17-04201-s001.pdf [file ijerph-17-04201-s001.pdf]

## Supplementary Materials

**Table S1.** Description of variables used in the analysis.

| Variable                                                             | Type of variable and/or definitions                                                                                                                                                                                                                                     |
|----------------------------------------------------------------------|-------------------------------------------------------------------------------------------------------------------------------------------------------------------------------------------------------------------------------------------------------------------------|
| <b>ESPA+ 2014 DATASET</b>                                            |                                                                                                                                                                                                                                                                         |
| <b>Facility type and location</b>                                    |                                                                                                                                                                                                                                                                         |
| Facility type                                                        | Binary (public, private); public included government and military facilities (health post, health centre, and primary hospital), whereas private included private for profit, private for-not-profit (lower clinic, medium clinic, higher clinic, and primary hospital) |
| Urban/rural location                                                 | Binary (urban, rural), classified based on the whether the facility is located in urban or rural areas                                                                                                                                                                  |
| Region                                                               | Categorical, 11 administrative regions                                                                                                                                                                                                                                  |
| <b>Facility's structural aspect</b>                                  |                                                                                                                                                                                                                                                                         |
| <b>Material resources</b>                                            |                                                                                                                                                                                                                                                                         |
| <b>Basic amenities/infrastructure</b>                                |                                                                                                                                                                                                                                                                         |
| Availability of electricity/generator                                | Binary (yes, no); whether the health facility possessed electricity/generator                                                                                                                                                                                           |
| Availability of functional landline telephone                        | Binary (yes, no); whether the health facility possessed functional telephone/cell phone                                                                                                                                                                                 |
| Availability of cell phone                                           | Binary (yes, no); whether the health facility possessed functional cell phone                                                                                                                                                                                           |
| Availability of functional computer                                  | Binary (yes, no); whether the health facility possessed functional computer                                                                                                                                                                                             |
| Access to email for two hours in a day                               | Binary (yes, no); whether the health facility get email for two hours/day                                                                                                                                                                                               |
| Access to water supply                                               | Binary (yes, no); whether the health facility possessed water supply                                                                                                                                                                                                    |
| <b>Equipment and supplies</b>                                        |                                                                                                                                                                                                                                                                         |
| Availability of body weight measurement tool                         | Binary (yes, no); whether the facility showed functioning weight scales.                                                                                                                                                                                                |
| Availability of Blood Pressure (BP) measurement tool                 | Binary (yes, no); whether the facility showed functioning BP measurement apparatus.                                                                                                                                                                                     |
| Availability of stethoscope                                          | Binary (yes, no); whether the facility showed functioning stethoscope                                                                                                                                                                                                   |
| Availability of examination light                                    | Binary (yes, no); whether the facility showed functioning examination light                                                                                                                                                                                             |
| Availability of exam couch                                           | Binary (yes, no); whether the facility showed examination couch for examining clients                                                                                                                                                                                   |
| Availability of sample FP methods                                    | Binary (yes, no); whether the facility showed sample FP methods for counselling                                                                                                                                                                                         |
| Availability of visual aid and leaflet                               | Binary (yes, no); whether the facility showed visual aid and leaflet for demonstration during counselling                                                                                                                                                               |
| Availability of pelvic model for demonstrating IUD use demonstration | Binary (yes, no); whether the facility showed pelvic model for demonstrating IUD use                                                                                                                                                                                    |
| Availability of model for demonstrating condom use                   | Binary (yes, no); whether the facility showed model for demonstrating condom                                                                                                                                                                                            |

|                                                                                                                    |                                                                                                                                                                                                                                                                                                                                                                                                                        |
|--------------------------------------------------------------------------------------------------------------------|------------------------------------------------------------------------------------------------------------------------------------------------------------------------------------------------------------------------------------------------------------------------------------------------------------------------------------------------------------------------------------------------------------------------|
| Mean number of contraceptive methods offered and/or prescribed                                                     | Continuous (0-12); the mean number of contraceptive methods offered or prescribed in the facility. The contraceptive methods included combined oral contraceptive pills, progestin only pills, progestin only injectables, male condom, female condom, implant, Intrauterine Device (IUD), periodic abstinence, emergency pills, female sterilization, and vasectomy (male sterilization), and lactational amenorrhea. |
| Mean number of infection prevention precaution measures                                                            | Continuous (0-14); the mean number of infection prevention precaution measures involved in the facility. It included availability of running water, handwashing soap, alcohol-based hand rub, waste receptacle, safety box, disposable latex glove, disinfectant/antiseptics, syringe, medical masks, gowns, eye protection goggle, standard precaution guidelines, and boots.                                         |
| <b>Human resources and organisational structure, and provision of other reproductive and child health services</b> |                                                                                                                                                                                                                                                                                                                                                                                                                        |
| Health availability of twenty-four hours/seven days                                                                | Binary (yes, no); whether facilities have health providers available to provide services for twenty-four hours of day (day, night, and week shifts)                                                                                                                                                                                                                                                                    |
| Trained provider availability                                                                                      | Binary (yes, no); whether the provider received FP related training in the past 24 months before the survey                                                                                                                                                                                                                                                                                                            |
| <b>Organisational structure</b>                                                                                    |                                                                                                                                                                                                                                                                                                                                                                                                                        |
| Quality assurance system                                                                                           | Binary (yes, no); whether or not the facility routinely carry out periodic audit of registers to see facility-wide review of clients/patients data                                                                                                                                                                                                                                                                     |
| FP guidelines/protocols                                                                                            | Binary (yes, no); whether the facility possessed FP guidelines/protocols on the date of survey                                                                                                                                                                                                                                                                                                                         |
| Client chart/record                                                                                                | Binary (yes, no); whether the facility possessed client chart or recoding for taking notes about the clients during history taking and physical assessment                                                                                                                                                                                                                                                             |
| Supervision in the past six months                                                                                 | Binary (yes, no); Whether the facility received a supervisory visit from district/regional/ zonal/federal offices in the six months before the survey                                                                                                                                                                                                                                                                  |
| Private room for providing counselling services                                                                    | Binary (yes, no); whether the facility's possessed private room for counselling during FP services                                                                                                                                                                                                                                                                                                                     |
| Presence of user fee for FP services                                                                               | Binary (yes, no); whether the facility collected users' fee for FP services.                                                                                                                                                                                                                                                                                                                                           |
| Mean number of days/week that FP was provided                                                                      | Continuous; mean number of days that FP services were provided in a week                                                                                                                                                                                                                                                                                                                                               |
| <b>Provision of other reproductive and child health services</b>                                                   |                                                                                                                                                                                                                                                                                                                                                                                                                        |
| Antenatal care services                                                                                            | Binary (yes, no); whether the facility provided antenatal care services during the survey                                                                                                                                                                                                                                                                                                                              |
| Normal delivery services                                                                                           | Binary (yes, no); whether the facility provided normal delivery services during the survey                                                                                                                                                                                                                                                                                                                             |
| Services for under-five children                                                                                   | Binary (yes, no); whether the facility provided under five services during the survey                                                                                                                                                                                                                                                                                                                                  |
| Services for the prevention of mother-to-child transmission (PMTCT) of HIV                                         | Binary (yes, no); whether the facility provided HIV test services during the survey                                                                                                                                                                                                                                                                                                                                    |
| Diagnosis and treatment STI                                                                                        | Binary (yes, no); whether the facility provided diagnosis and treatment STI services during the survey                                                                                                                                                                                                                                                                                                                 |
| <b>EDHS 2016 DATASET</b>                                                                                           |                                                                                                                                                                                                                                                                                                                                                                                                                        |
| <b>Sources of FP method by facility types</b>                                                                      | Categorical; public (government health station/centre, government health post, and public pharmacy, and other public sector) , private (private clinics, pharmacy, non-governmental organisation's health facilities, private clinics, and private pharmacies, and other private medical)                                                                                                                              |
| <b>Characteristics of women</b>                                                                                    |                                                                                                                                                                                                                                                                                                                                                                                                                        |
| Age category in years                                                                                              | Categorical; 15-24, 25-34, 35+                                                                                                                                                                                                                                                                                                                                                                                         |
| Marital status                                                                                                     | Binary (yes, no); currently married (married or in sexual union), currently unmarried (never married, divorced, widowed, separated)                                                                                                                                                                                                                                                                                    |

|                                    |                                                                                                                                                                                      |
|------------------------------------|--------------------------------------------------------------------------------------------------------------------------------------------------------------------------------------|
| Place of residence                 | Binary (yes, no); Urban, rural                                                                                                                                                       |
| Region                             | Categorical; 11 administrative regions                                                                                                                                               |
| Religion                           | Categorical; Orthodox, Muslim, Protestant, others                                                                                                                                    |
| Highest educational status         | Categorical; none, primary, secondary+                                                                                                                                               |
| Highest partner educational status | Categorical; none, primary, secondary+                                                                                                                                               |
| Working/occupational status        | Categorical; Not working (not employed/not working), working ( <i>women who describe themselves as employed or engaged in a work that paid them in cash or in kind</i> )             |
| Wealth index                       | Categorical; poor, middle, rich                                                                                                                                                      |
| Number of living children          | Categorical; 0, 1-2,3-4,5+                                                                                                                                                           |
| Exposure to FP media               | Binary (yes, no); whether a woman heard or read about FP methods in radio/television/newspaper/mobile message                                                                        |
| Women decision making              | Binary (yes, no); whether a woman able to make decisions alone or with her partner regarding about her health care, large household purchase, and visiting her families or relatives |

FP- Family planning, BP- Blood Pressure, IUD- Intrauterine Contraceptive Device, STI- Sexual transmitted Infections, HIV- Human Immunodeficiency Virus.

**Table S2.** Facility's location, structure, and provisions of reproductive and child health services in PHCU facilities in Ethiopia, ESPA+ 2014 (n=1,094).

| Variables                                                     | Private (n=139) |         | Public (n=955) |         |
|---------------------------------------------------------------|-----------------|---------|----------------|---------|
|                                                               | Frequency       | Percent | Frequency      | Percent |
| <i>Facility's location and region</i>                         |                 |         |                |         |
| <b>Urban/rural location</b>                                   |                 |         |                |         |
| Rural                                                         | 65              | 46.6    | 889            | 93.1    |
| Urban                                                         | 74              | 53.4    | 66             | 6.9     |
| <i>Material resources</i>                                     |                 |         |                |         |
| <b>Basic amenities</b>                                        |                 |         |                |         |
| Availability of functional landline telephone                 | 20              | 14.1    | 40             | 4.2     |
| Availability of functional cell phone                         | 84              | 60.6    | 140            | 14.6    |
| Availability of functional computer                           | 16              | 11.4    | 93             | 9.7     |
| Availability of short-wave radio                              | 1               | 0.7     | 0              | 0.0     |
| Access to email at least two hours on a day                   | 7               | 5.3     | 8              | 0.9     |
| Access to water supply                                        | 126             | 90.6    | 614            | 64.3    |
| Availability Electricity supply/generator                     | 66              | 47.7    | 354            | 37.1    |
| At least one basic amenity                                    | 134             | 97.7    | 761            | 79.8    |
| <b>Equipment and supplies</b>                                 |                 |         |                |         |
| Availability of body weight measurement tool                  | 16              | 11.9    | 97             | 10.1    |
| Availability of blood pressure measurement tool               | 19              | 14.0    | 96             | 10.0    |
| Availability of stethoscope                                   | 133             | 95.8    | 678            | 71.0    |
| Availability of examination light                             | 114             | 81.9    | 340            | 35.7    |
| Availability of exam couch                                    | 134             | 96.4    | 560            | 58.7    |
| Availability of sample FP methods                             | 75              | 54.2    | 427            | 44.7    |
| Availability of visual aid and leaflet                        | 75              | 53.8    | 507            | 53.1    |
| Mean number of types of contraceptive methods in the facility | 6(SD=2.4)       |         | 5(SD=2.1)      |         |
| Mean number of infection prevention precaution measures       | 8.2(SD=2.2)     |         | 6.8(2.6)       |         |

FP-Family Planning. SD- Standard Deviation.

**Table S2. Cont.**

| Variables                                                           | Private (n=139) |         | Public (n=955) |         |
|---------------------------------------------------------------------|-----------------|---------|----------------|---------|
|                                                                     | Frequency       | Percent | Frequency      | Percent |
| <i>Human resources</i>                                              |                 |         |                |         |
| Health provider availability of twenty-four hours/seven days a week | 22              | 15.7    | 206            | 21.6    |
| Trained provider availability                                       | 46              | 33.5    | 613            | 64.2    |
| <i>Organisational structure</i>                                     |                 |         |                |         |
| System to collect client opinion                                    | 2               | 1.7     | 129            | 13.1    |
| FP guidelines/protocols                                             | 40              | 28.9    | 465            | 48.7    |
| Client chart/record to document client's clinical data              | 44              | 31.6    | 632            | 66.2    |
| Supervision in the past six months                                  | 70              | 51.4    | 527            | 58.0    |
| Private room for providing counselling services                     | 123             | 88.6    | 783            | 82.0    |
| Presence of user fee for FP services                                | 109             | 91.6    | 3              | 1.5     |
| Mean number of days/week that FP was provided                       | 6.4 (SD=0.71)   |         | 5.1(SD=1.27)   |         |
| <i>Provisions of other reproductive and child health services</i>   |                 |         |                |         |
| Antenatal care services                                             | 78              | 55.9    | 909            | 95.3    |
| Normal delivery services                                            | 36              | 26.1    | 538            | 56.4    |
| Service for under five children                                     | 123             | 88.5    | 933            | 97.7    |
| Services for the prevention of mother-to-child transmission of HIV  | 15              | 10.7    | 179            | 18.7    |
| Diagnosis and treat for STI                                         | 123             | 88.4    | 341            | 35.8    |

FP-Family Planning. STI- Sexual Transmitted Infections. HIV- Human Immunodeficiency Virus. SD- Standard Deviation.
